# Supplementary material for: GRID – Genomics of Rare Immune Disorders: a highly sensitive and specific diagnostic gene panel for patients with primary immunodeficiencies
Source: bioRxiv or medRxiv preprint supplement (doi:10.1101/431544), 2019-01-15
Supplement: Supplementary file [file media-2.pdf]

| HGNC Gene Symbol | Transcript (RefSeq) | Transcript (Ensembl) | Locus Reference Genomic (LRG) ID | % ROI covered by at least 20X | Problematic exons         | # HGMD variants in problematic ROI regions           | Regions excluded from CNV calling |
|------------------|---------------------|----------------------|----------------------------------|-------------------------------|---------------------------|------------------------------------------------------|-----------------------------------|
| ACD              | NM_001082486.1      | ENST00000219251      |                                  | 100                           |                           |                                                      |                                   |
| ACP5             | NM_001111034.2      | ENST00000592828      |                                  | 100                           |                           |                                                      |                                   |
| ACTB             | NM_0011101.3        | ENST00000331789      | LRG_132                          | 100                           |                           |                                                      |                                   |
| ADA              | NM_000022.2         | ENST00000372874      | LRG_16                           | 100                           |                           |                                                      |                                   |
| ADA2             | NM_001282227.1      | ENST00000399839      |                                  | 100                           |                           |                                                      |                                   |
| ADAM17           | NM_003183.4         | ENST00000310823      |                                  | 99.9996                       |                           |                                                      |                                   |
| ADAR             | NM_001111.4         | ENST00000368474      |                                  | 100                           |                           |                                                      |                                   |
| AICDA            | NM_020661.2         | ENST00000229335      | LRG_17                           | 99.997                        |                           |                                                      |                                   |
| AIRE             | NM_000383.3         | ENST00000291582      | LRG_18                           | 100                           |                           |                                                      |                                   |
| AK2              | NM_013411.3         | ENST00000354858      | LRG_133                          | 100                           |                           |                                                      |                                   |
| AP3B1            | NM_001271769        | ENST00000519295      | LRG_170                          | 99.9996                       |                           |                                                      |                                   |
| APOL1            | NM_145343.2         | ENST00000319136      | LRG_169                          | 100                           |                           |                                                      |                                   |
| ARPC1B           | NM_005720           | ENST00000252725      |                                  | 100                           |                           |                                                      |                                   |
| ATM              | NM_000051.3         | ENST00000278616      | LRG_135                          | 99.9907                       |                           | 1 (CS135658)                                         |                                   |
| B2M              | NM_004048.2         | ENST00000558401      |                                  | 100                           |                           |                                                      |                                   |
| BCL10            | NM_003921.4         | ENST00000370580      |                                  | 100                           |                           |                                                      |                                   |
| BLM              | NM_000057.2         | ENST00000355112      | LRG_20                           | 100                           |                           |                                                      |                                   |
| BLNK             | NM_013314.3         | ENST00000224337      | LRG_21                           | 100                           |                           |                                                      |                                   |
| BLOC1S6          | NM_012388.3         | ENST00000220531      | LRG_883                          | 100                           |                           |                                                      |                                   |
| BTK              | NM_000061.2         | ENST00000308731      | LRG_128                          | 100                           |                           |                                                      |                                   |
| C1QA             | NM_015991.2         | ENST00000374642      | LRG_22                           | 100                           |                           |                                                      |                                   |
| C1QB             | NM_000491.3         | ENST00000314933      | LRG_23                           | 100                           |                           |                                                      |                                   |
| C1QC             | NM_001114101.1      | ENST00000374639      | LRG_24                           | 100                           |                           |                                                      |                                   |
| C1R              | NM_001733           | ENST00000542285      |                                  | 100                           |                           |                                                      |                                   |
| C1S              | NM_201442/NM_001734 | ENST00000328916      | LRG_25                           | 100                           |                           |                                                      |                                   |
| C2               | NM_000063.4         | ENST00000299367      | LRG_26                           | 100                           |                           |                                                      |                                   |
| C3               | NM_000064.2         | ENST00000245907      | LRG_27                           | 100                           |                           |                                                      |                                   |
| C4A              | NM_007293.2         | ENST00000428956      | LRG_137                          | 20.0389                       | 1-20, 22-24, 29-30, 32-41 | 5 (CD045879, CM094583, CD983970, CI931069, CI094587) | whole gene                        |
| C4B              | NM_001002029.3      | ENST00000435363      | LRG_138                          | 22.6978                       | 1-19, 21-24, 31-41        | 4 (CM920135, CM940213, CD024038, CI094586)           | whole gene                        |
| C5               | NM_001735.2         | ENST00000223642      | LRG_28                           | 100                           |                           |                                                      |                                   |
| C6               | NM_000065.2         | ENST00000263413      | LRG_29                           | 100                           |                           |                                                      |                                   |
| C7               | NM_000587.2         | ENST00000313164      | LRG_30                           | 100                           |                           |                                                      |                                   |
| C8A              | NM_000562.2         | ENST00000361249      | LRG_139                          | 100                           |                           |                                                      |                                   |
| C8B              | NM_000066.2         | ENST00000371237      | LRG_31                           | 100                           |                           |                                                      |                                   |
| C8G              | NM_000606.2         | ENST00000224181      |                                  | 100                           |                           |                                                      |                                   |
| C9               | NM_001737.3         | ENST00000263408      | LRG_32                           | 100                           |                           |                                                      |                                   |
| CARD11           | NM_032415.5         | ENST00000396946      | LRG_729                          | 100                           |                           |                                                      |                                   |
| CARD14           | NM_024110.4         | ENST00000344227      |                                  | 100                           |                           |                                                      |                                   |
| CARD9            | NM_052813.4         | ENST00000371732      | LRG_178                          | 99.9997                       |                           |                                                      |                                   |
| CASP10           | NM_032977.3         | ENST00000286186      | LRG_33                           | 99.9997                       |                           |                                                      |                                   |
| CASP8            | NM_001228.4         | ENST00000358485      | LRG_34                           | 100                           |                           |                                                      |                                   |
| CCBE1            | NM_133459.3         | ENST00000439986      |                                  | 100                           |                           |                                                      |                                   |
| CD19             | NM_001770.5         | ENST00000538922      | LRG_35                           | 100                           |                           |                                                      |                                   |
| CD247            | NM_198053.2         | ENST00000362089      | LRG_36                           | 100                           |                           |                                                      |                                   |
| CD27             | NM_001242.4         | ENST00000266557      | LRG_357                          | 100                           |                           |                                                      |                                   |
| CD3D             | NM_000732.4         | ENST00000300692      | LRG_37                           | 100                           |                           |                                                      |                                   |
| CD3E             | NM_000733.3         | ENST00000361763      | LRG_38                           | 100                           |                           |                                                      |                                   |
| CD3G             | NM_000073.2         | ENST00000532917      | LRG_39                           | 100                           |                           |                                                      |                                   |
| CD40             | NM_001250.4         | ENST00000372285      | LRG_40                           | 100                           |                           |                                                      |                                   |
| CD40LG           | NM_000074.2         | ENST00000370629      | LRG_141                          | 100                           |                           |                                                      |                                   |
| CD46             | NM_002389.4         | ENST00000322875      | LRG_155                          | 100                           |                           |                                                      |                                   |
| CD59             | NM_203330.2         | ENST00000395850      | LRG_41                           | 100                           |                           |                                                      |                                   |
| CD79A            | NM_001783.3         | ENST00000221972      | LRG_42                           | 100                           |                           |                                                      |                                   |
| CD79B            | NM_001039933.1      | ENST00000392795      | LRG_43                           | 100                           |                           |                                                      |                                   |
| CD81             | NM_004356.3         | ENST00000263645      | LRG_142                          | 100                           |                           |                                                      |                                   |
| CD8A             | NM_001768.6         | ENST00000409511      | LRG_44                           | 100                           |                           |                                                      |                                   |
| CEBPE            | NM_001805.2         | ENST00000206513      | LRG_45                           | 100                           |                           |                                                      |                                   |
| CFB              | NM_001710.5         | ENST00000425368      | LRG_136                          | 100                           |                           |                                                      |                                   |
| CFD              | NM_001928.2         | ENST00000327726      | LRG_46                           | 100                           |                           |                                                      |                                   |
| CFH              | NM_000186.3         | ENST00000367429      | LRG_47                           | 100                           |                           |                                                      | exon 20                           |
| CFHR1            | NM_002113.2         | ENST00000320493      | LRG_149                          | 90.8573                       | 1-6                       | 1 (CM098960)                                         | whole gene                        |
| CFHR2            | NM_005666.3         | ENST00000367415      |                                  | 95.0427                       | 1                         | 0                                                    | exon 1                            |
| CFHR3            | NM_021023.5         | ENST00000367425      | LRG_175                          | 90.4165                       | 1-6                       | 1 (CD098961)                                         | whole gene                        |
| CFHR4            | NM_001201551.1      | ENST00000367416      |                                  | 100                           |                           |                                                      | exon 9                            |
| CFHR5            | NM_030787.3         | ENST00000256785      | LRG_227                          | 100                           |                           |                                                      |                                   |
| CFI              | NM_000204.3         | ENST00000394634      | LRG_48                           | 100                           |                           |                                                      |                                   |
| CFP              | NM_002621.2         | ENST00000247153      | LRG_129                          | 100                           |                           |                                                      |                                   |

|         |                |                 |         |         |      |                   |            |
|---------|----------------|-----------------|---------|---------|------|-------------------|------------|
| CHD7    | NM 017780.2    | ENST00000423902 | LRG 176 | 100     |      |                   |            |
| CIITA   | NM 000246.3    | ENST00000324288 | LRG 49  | 100     |      |                   |            |
| CLPB    | NM 030813.5    | ENST00000294053 |         | 100     |      |                   |            |
| COPA    | NM 001098398.1 | ENST00000368069 |         | 100     |      |                   |            |
| CORO1A  | NM 007074.3    | ENST00000219150 | LRG 195 | 92.0077 | 11   | 0                 |            |
| CR2     | NM 001006658.2 | ENST00000367057 | LRG 348 | 100     |      |                   |            |
| CSF2RA  | NM 001161529.1 | ENST00000432318 | LRG 186 | 100     |      |                   |            |
| CSF3R   | NM 156039.3    | ENST00000373103 | LRG 144 | 100     |      |                   |            |
| CTLA4   | NM 005214.4    | ENST00000302823 |         | 100     |      |                   |            |
| CTPS1   | NM 001905.3    | ENST00000372621 |         | 100     |      |                   |            |
| CTSC    | NM 001814.4    | ENST00000227266 | LRG 50  | 100     |      |                   |            |
| CXCR4   | NM 003467.2    | ENST00000409817 | LRG 51  | 100     |      |                   |            |
| CYBA    | NM 000101.3    | ENST00000261623 | LRG 52  | 100     |      |                   |            |
| CYBB    | NM 000397.3    | ENST00000378588 | LRG 53  | 100     |      |                   |            |
| DCLRE1B | NM 001319946.1 | ENST00000369563 |         | 100     |      |                   |            |
| DCLRE1C | NM 001033855.2 | ENST00000378278 | LRG 54  | 99.96   |      | 1 (CS119472)      |            |
| DKC1    | NM 001363.3    | ENST00000369550 | LRG 55  | 100     |      |                   |            |
| DNMT3B  | NM 006892.3    | ENST00000328111 | LRG 56  | 100     |      |                   |            |
| DOCK2   | NM 004946.2    | ENST00000256935 |         | 100     |      |                   |            |
| DOCK8   | NM 203447.3    | ENST00000453981 | LRG 196 | 99.9993 |      |                   |            |
| ELANE   | NM 001972.2    | ENST00000590230 | LRG 57  | 100     |      |                   |            |
| EPG5    | NM 020964.2    | ENST00000282041 |         | 99.9923 |      |                   |            |
| F12     | NM 000505.3    | ENST00000253496 | LRG 145 | 100     |      |                   |            |
| FADD    | NM 003824.3    | ENST00000301838 | LRG 228 | 100     |      |                   |            |
| FAS     | NM 000043.4    | ENST00000355740 | LRG 134 | 100     |      |                   |            |
| FASLG   | NM 000639.1    | ENST00000367721 | LRG 58  | 100     |      |                   |            |
| FCGR3A  | NM 001127593.1 | ENST00000367969 | LRG 60  | 99.9961 |      |                   | whole gene |
| FCGR3B  | NM 000570.4    | ENST00000531221 |         | 96.3311 | 3    | 0                 | whole gene |
| FCN3    | NM 003665.2    | ENST00000270879 | LRG 171 | 100     |      |                   |            |
| FERMT3  | NM 178443.2    | ENST00000279227 | LRG 180 | 100     |      |                   |            |
| FOXP1   | NM 003593.2    | ENST00000226247 | LRG 61  | 100     |      |                   |            |
| FOXP3   | NM 014009.3    | ENST00000376207 | LRG 62  | 100     |      |                   |            |
| FPR1    | NM 001193306   | ENST00000595042 | LRG 146 | 100     |      |                   |            |
| G6PC3   | NM 138387.3    | ENST00000269097 | LRG 182 | 100     |      |                   |            |
| GATA2   | NM 001145661.1 | ENST00000341105 | LRG 295 | 100     |      |                   |            |
| GFI1    | NM 005263.3    | ENST00000370332 | LRG 63  | 100     |      |                   |            |
| HAX1    | NM 006118.3    | ENST00000328703 | LRG 64  | 100     |      |                   |            |
| ICOS    | NM 012092.3    | ENST00000316386 | LRG 65  | 100     |      |                   |            |
| IFIH1   | NM 022168.3    | ENST00000263642 |         | 100     |      |                   |            |
| IFNGR1  | NM 000416.2    | ENST00000367739 | LRG 66  | 100     |      |                   |            |
| IFNGR2  | NM 005534.3    | ENST00000290219 | LRG 67  | 100     |      |                   |            |
| IGHM    |                | ENST00000390559 |         | 100     |      |                   |            |
| IGKC    |                | ENST00000390237 |         | 100     |      |                   |            |
| IGLL1   | NM 020070.2    | ENST00000330377 | LRG 69  | 100     |      |                   |            |
| IKBKB   | NM 001556.2    | ENST00000520810 |         | 100     |      |                   |            |
| IKBKG   | NM_001099857.2 | ENST00000369609 | LRG_70  | 39.6866 | 3-10 | 41 (upon request) | exons 3-10 |
| IKZF1   | NM 006060.5    | ENST00000439701 |         | 100     |      |                   |            |
| IL10    | NM 000572.2    | ENST00000423557 |         | 100     |      |                   |            |
| IL10RA  | NM 001558.3    | ENST00000227752 | LRG 151 | 100     |      |                   |            |
| IL10RB  | NM 000628.4    | ENST00000290200 | LRG 152 | 100     |      |                   |            |
| IL12B   | NM 002187.2    | ENST00000231228 | LRG 71  | 100     |      |                   |            |
| IL12RB1 | NM 005535.1    | ENST00000600835 | LRG 72  | 100     |      |                   |            |
| IL17A   | NM 002190.2    | ENST00000340057 |         | 100     |      |                   |            |
| IL17F   | NM 052872.3    | ENST00000336123 | LRG 356 | 100     |      |                   |            |
| IL17RA  | NM 014339.6    | ENST00000319363 | LRG 355 | 100     |      |                   |            |
| IL17RC  | NM 153461.3    | ENST00000295981 |         | 100     |      |                   |            |
| IL1RN   | NM 173841.2    | ENST00000259206 | LRG 188 | 100     |      |                   |            |
| IL21    | NM 021803.3    | ENST00000264497 |         | 100     |      |                   |            |
| IL21R   | NM 181079.4    | ENST00000337929 | LRG 731 | 100     |      |                   |            |
| IL22    | NM 020525      | ENST00000538666 |         | 100     |      |                   |            |
| IL2RA   | NM 000417.2    | ENST00000379959 | LRG 73  | 100     |      |                   |            |
| IL2RG   | NM 000206.2    | ENST00000374202 | LRG 150 | 100     |      |                   |            |
| IL36RN  | NM 173170.1    | ENST00000393200 | LRG 730 | 100     |      |                   |            |
| IL7R    | NM 002185.3    | ENST00000303115 | LRG 74  | 100     |      |                   |            |
| INO80   | NM 017553.2    | ENST00000361937 |         | 100     |      |                   |            |
| IRAK4   | NM 016123.3    | ENST00000448290 | LRG 75  | 100     |      |                   |            |
| IRF7    | NM 001572.3    | ENST00000397566 |         | 100     |      |                   |            |
| IRF8    | NM 002163.2    | ENST00000268638 | LRG 294 | 100     |      |                   |            |
| ISG15   | NM 005101.3    | ENST00000379389 |         | 100     |      |                   |            |
| ITCH    | NM 031483.4    | ENST00000262650 | LRG 354 | 100     |      |                   |            |
| ITGAM   | NM 001145808.1 | ENST00000544665 |         | 100     |      |                   |            |
| ITGB2   | NM 000211.3    | ENST00000397850 | LRG 76  | 100     |      |                   |            |
| ITK     | NM 005546.3    | ENST00000422843 | LRG 189 | 100     |      |                   |            |
| JAGN1   | NM 032492.3    | ENST00000307768 |         | 100     |      |                   |            |
| JAK3    | NM 000215.3    | ENST00000458235 | LRG 77  | 100     |      |                   |            |
| KRAS    | NM 033360.3    | ENST00000256078 | LRG 344 | 100     |      |                   |            |
| LAMTOR2 | NM 014017.3    | ENST00000368305 | LRG 81  | 100     |      |                   |            |
| LCK     | NM 005356.4    | ENST00000336890 | LRG 153 | 100     |      |                   |            |

|          |                |                 |         |         |               |                                                                |               |
|----------|----------------|-----------------|---------|---------|---------------|----------------------------------------------------------------|---------------|
| LIG1     | NM 000234.1    | ENST00000263274 | LRG 78  | 100     |               |                                                                |               |
| LIG4     | NM 002312.3    | ENST00000356922 | LRG 79  | 100     |               |                                                                |               |
| LPIN2    | NM 014646.2    | ENST00000261596 | LRG 174 | 100     |               |                                                                |               |
| LRBA     | NM 006726.4    | ENST00000357115 |         | 99.9972 |               |                                                                |               |
| LYST     | NM 000081.3    | ENST00000389794 | LRG 143 | 100     |               |                                                                |               |
| MAGT1    | NM 032121.5    | ENST00000358075 | LRG 353 | 100     |               |                                                                |               |
| MALT1    | NM 006785.3    | ENST00000348428 |         | 99.9983 |               |                                                                |               |
| MAP3K14  | NM 003954.4    | ENST00000344686 |         | 100     |               |                                                                |               |
| MASP2    | NM 006610.3    | ENST00000400897 | LRG 82  | 100     |               |                                                                |               |
| MBL2     | NM 000242.2    | ENST00000373968 | LRG 154 | 100     |               |                                                                |               |
| MCM4     | NM 005914.3    | ENST00000262105 |         | 100     |               |                                                                |               |
| MEFV     | NM 000243.2    | ENST00000219596 | LRG 190 | 100     |               |                                                                |               |
| MOGS     | NM 006302.2    | ENST00000233616 |         | 100     |               |                                                                |               |
| MPO      | NM 000250.1    | ENST00000225275 | LRG 84  | 100     |               |                                                                |               |
| MRE11    | NM 005591      | ENST00000323929 | LRG 85  | 100     |               |                                                                |               |
| MS4A1    | NM 152866.2    | ENST00000534668 | LRG 140 | 100     |               |                                                                |               |
| MSH6     | NM 000179.2    | ENST00000234420 | LRG 219 | 100     |               |                                                                |               |
| MTHFD1   | NM 005956.3    | ENST00000216605 |         | 100     |               |                                                                |               |
| MVK      | NM 000431.2    | ENST00000228510 | LRG 156 | 100     |               |                                                                |               |
| MYD88    | NM 001172567.1 | ENST00000417037 | LRG 157 | 100     |               |                                                                |               |
| NBN      | NM 002485.4    | ENST00000265433 | LRG 158 | 100     |               |                                                                |               |
| NCF1     | NM_000265.5    | ENST00000289473 | LRG_87  | 68.9749 | 1, 5, 8-9, 11 | 6 (CS014965, CS014966, CM961019, CD101818, CD014969, CD094221) | exons 1, 3-11 |
| NCF2     | NM 000433.3    | ENST00000367535 | LRG 88  | 100     |               |                                                                |               |
| NCF4     | NM 013416.3    | ENST00000397147 | LRG 159 | 100     |               |                                                                |               |
| NFAT5    | NM 138714.3    | ENST00000432919 |         | 99.9962 |               |                                                                |               |
| NFKB1    | NM 003998.3    | ENST00000226574 |         | 100     |               |                                                                |               |
| NFKB2    | NM 001288724.1 | ENST00000369966 |         | 100     |               |                                                                |               |
| NFKBIA   | NM 020529.2    | ENST00000216797 | LRG 89  | 100     |               |                                                                |               |
| NHEJ1    | NM 024782.2    | ENST00000356853 | LRG 90  | 100     |               |                                                                |               |
| NHP2     | NM 017838.3    | ENST00000274606 | LRG 346 | 100     |               |                                                                |               |
| NLRC4    | NM 021209.4    | ENST00000404025 |         | 100     |               |                                                                |               |
| NLRP12   | NM 144687.3    | ENST00000324134 | LRG 181 | 100     |               |                                                                |               |
| NLRP3    | NM 004895.4    | ENST00000336119 | LRG 197 | 100     |               |                                                                |               |
| NOD2     | NM 022162.1    | ENST00000300589 | LRG 177 | 100     |               |                                                                |               |
| NOP10    | NM 018648.3    | ENST00000328848 | LRG 345 | 100     |               |                                                                |               |
| NRAS     | NM 002524.4    | ENST00000369535 | LRG 92  | 100     |               |                                                                |               |
| ORAI1    | NM 032790.3    | ENST00000330079 | LRG 93  | 99.4254 | 1             | 0                                                              |               |
| PARN     | NM 002582.3    | ENST00000437198 |         | 100     |               |                                                                |               |
| PGM3     | NM 001199917.1 | ENST00000506587 |         | 100     |               |                                                                |               |
| PIK3CD   | NM 005026.3    | ENST00000377346 | LRG 191 | 100     |               |                                                                |               |
| PIK3R1   | NM 181523.2    | ENST00000521381 | LRG 453 | 100     |               |                                                                |               |
| PLCG2    | NM 002661.4    | ENST00000359376 | LRG 376 | 100     |               |                                                                |               |
| PMS2     | NM_000535.5    | ENST00000265849 | LRG_161 | 99.1136 | 15            | 2 (CM1515443, CI146161)                                        | exons 13-15   |
| PNP      | NM 000270.3    | ENST00000361505 | LRG 91  | 100     |               |                                                                |               |
| POLE     | NM 006231.3    | ENST00000320574 | LRG 789 | 100     |               |                                                                |               |
| PRF1     | NM 001083116.1 | ENST00000441259 | LRG 94  | 100     |               |                                                                |               |
| PRKCD    | NM 006254.3    | ENST00000394729 |         | 100     |               |                                                                |               |
| PRKDC    | NM 006904.6    | ENST00000314191 | LRG 162 | 99.9996 |               |                                                                |               |
| PSMB8    | NM 004159.4    | ENST00000374882 |         | 100     |               |                                                                |               |
| PSTPIP1  | NM 003978.3    | ENST00000558012 | LRG 172 | 100     |               |                                                                |               |
| PTPRC    | NM 002838.4    | ENST00000442510 | LRG 95  | 99.8531 | 27            | 0                                                              |               |
| RAB27A   | NM 004580.4    | ENST00000396307 | LRG 96  | 100     |               |                                                                |               |
| RAC2     | NM 002872.3    | ENST00000249071 | LRG 97  | 100     |               |                                                                |               |
| RAG1     | NM 000448.2    | ENST00000299440 | LRG 98  | 100     |               |                                                                |               |
| RAG2     | NM 000536.3    | ENST00000311485 | LRG 99  | 100     |               |                                                                |               |
| RBCK1    | NM 031229.2    | ENST00000356286 | LRG 728 | 100     |               |                                                                |               |
| RFX5     | NM 000449.3    | ENST00000290524 | LRG 101 | 100     |               |                                                                |               |
| RFXANK   | NM 003721.3    | ENST00000303088 | LRG 102 | 100     |               |                                                                |               |
| RFXAP    | NM 000538.3    | ENST00000255476 | LRG 103 | 100     |               |                                                                |               |
| RHOH     | NM 004310.4    | ENST00000381799 | LRG 736 | 100     |               |                                                                |               |
| RMRP     | NR 003051.3    | ENST00000602361 | LRG 163 | 100     |               |                                                                |               |
| RNASEH2A | NM 006397.2    | ENST00000221486 | LRG 278 | 100     |               |                                                                |               |
| RNASEH2B | NM 001142279.2 | ENST00000336617 | LRG 279 | 100     |               |                                                                |               |
| RNASEH2C | NM 032193.3    | ENST00000308418 | LRG 280 | 100     |               |                                                                |               |
| RNF168   | NM 152617.3    | ENST00000318037 | LRG 185 | 100     |               |                                                                |               |
| RNF31    | NM 017999.4    | ENST00000324103 |         | 100     |               |                                                                |               |
| RORC     | NM 005060.3    | ENST00000318247 |         | 100     |               |                                                                |               |
| RPSA     | NM 002295.4    | ENST00000301821 | LRG 735 | 100     |               |                                                                |               |
| RTKL1    | NM 016434.3    | ENST00000508582 |         | 100     |               |                                                                |               |
| SAMHD1   | NM 015474.3    | ENST00000262878 | LRG 281 | 100     |               |                                                                |               |
| SART3    | NM 014706.3    | ENST00000228284 |         | 100     |               |                                                                |               |
| SBDS     | NM 016038.2    | ENST00000246868 | LRG 104 | 100     |               |                                                                |               |
| SEMA3E   | NM 012431.2    | ENST00000307792 |         | 100     |               |                                                                |               |

|           |                |                 |         |         |   |   |  |
|-----------|----------------|-----------------|---------|---------|---|---|--|
| SERPING1  | NM 000062.2    | ENST00000278407 | LRG 105 | 100     |   |   |  |
| SH2D1A    | NM 002351.4    | ENST00000371139 | LRG 106 | 100     |   |   |  |
| SH3BP2    | NM 001122681.1 | ENST00000503393 |         | 100     |   |   |  |
| SLC29A3   | NM 018344.5    | ENST00000373189 |         | 100     |   |   |  |
| SLC35C1   | NM 018389.4    | ENST00000314134 | LRG 107 | 100     |   |   |  |
| SLC37A4   | NM 001164277.1 | ENST00000357590 | LRG 187 | 99.9389 | 6 | 0 |  |
| SLC46A1   | NM 080669.3    | ENST00000440501 | LRG 183 | 99.9347 | 4 | 0 |  |
| SMARCAL1  | NM 014140.3    | ENST00000357276 | LRG 108 | 100     |   |   |  |
| SP110     | NM 080424.2    | ENST00000258381 | LRG 109 | 100     |   |   |  |
| SPINK5    | NM 006846.3    | ENST00000359874 | LRG 110 | 100     |   |   |  |
| STAT1     | NM 007315.3    | ENST00000361099 | LRG 111 | 100     |   |   |  |
| STAT2     | NM 005419.3    | ENST00000314128 |         | 100     |   |   |  |
| STAT3     | NM 139276.2    | ENST00000264657 | LRG 112 | 100     |   |   |  |
| STAT5B    | NM 012448.3    | ENST00000293328 | LRG 192 | 99.9998 |   |   |  |
| STIM1     | NM 003156.3    | ENST00000300737 | LRG 164 | 100     |   |   |  |
| STK4      | NM 006282.2    | ENST00000372806 | LRG 535 | 100     |   |   |  |
| STX11     | NM 003764.3    | ENST00000367568 | LRG 113 | 100     |   |   |  |
| STXBP2    | NM 006949.2    | ENST00000221283 | LRG 165 | 100     |   |   |  |
| TAP1      | NM 000593.5    | ENST00000354258 | LRG 166 | 100     |   |   |  |
| TAP2      | NM 000544.3    | ENST00000374899 | LRG 167 | 100     |   |   |  |
| TAPBP     | NM 003190.4    | ENST00000426633 | LRG 114 | 100     |   |   |  |
| TAZ       | NM 000116.3    | ENST00000299328 | LRG 131 | 100     |   |   |  |
| TBK1      | NM 013254.3    | ENST00000331710 |         | 99.9986 |   |   |  |
| TBX1      | NM 080647.1    | ENST00000332710 | LRG 226 | 95.4855 | 3 | 0 |  |
| TCF3      | NM 003200.3    | ENST00000262965 |         | 100     |   |   |  |
| TCN2      | NM 000355.2    | ENST00000215838 | LRG 116 | 100     |   |   |  |
| TERC      | NR 001566.1    | ENST00000602385 | LRG 347 | 100     |   |   |  |
| TERT      | NM 198253.2    | ENST00000310581 | LRG 343 | 100     |   |   |  |
| THBD      | NM 000361.2    | ENST00000377103 | LRG 168 | 100     |   |   |  |
| TICAM1    | NM 182919.3    | ENST00000248244 | LRG 358 | 100     |   |   |  |
| TINF2     | NM 012461.2    | ENST00000267415 |         | 100     |   |   |  |
| TLR3      | NM 003265.2    | ENST00000296795 | LRG 117 | 100     |   |   |  |
| TMC6      | NM 007267.6    | ENST00000322914 | LRG 118 | 100     |   |   |  |
| TMC8      | NM 152468.4    | ENST00000318430 | LRG 119 | 100     |   |   |  |
| TMEM173   | NM 198282.3    | ENST00000330794 |         | 100     |   |   |  |
| TNFRSF13B | NM 012452.2    | ENST00000261652 | LRG 120 | 100     |   |   |  |
| TNFRSF13C | NM 052945.3    | ENST00000291232 | LRG 184 | 100     |   |   |  |
| TNFRSF1A  | NM 001065.3    | ENST00000162749 | LRG 193 | 100     |   |   |  |
| TNFRSF4   | NM 003327.3    | ENST00000379236 |         | 100     |   |   |  |
| TNFSF12   | NM 003809.2    | ENST00000293825 |         | 100     |   |   |  |
| TPP2      | NM 003291      | ENST00000376065 |         | 100     |   |   |  |
| TRAC      |                | ENST00000478163 |         | 100     |   |   |  |
| TRAF3     | NM 145725.2    | ENST00000560371 | LRG 229 | 100     |   |   |  |
| TRAF3IP2  |                | ENST00000340026 |         | 100     |   |   |  |
| TREX1     | NM 033629.4    | ENST00000422277 | LRG 282 | 100     |   |   |  |
| TRNT1     | NM 001302946.1 | ENST00000251607 |         | 100     |   |   |  |
| TTC37     | NM 014639.3    | ENST00000358746 | LRG 173 | 100     |   |   |  |
| TTC7A     | NM 001288953.1 | ENST00000319190 |         | 100     |   |   |  |
| TYK2      | NM 003331.4    | ENST00000525621 | LRG 121 | 100     |   |   |  |
| UNC119    | NM 005148.3    | ENST00000335765 | LRG 341 | 100     |   |   |  |
| UNC13D    | NM 199242.2    | ENST00000207549 | LRG 122 | 100     |   |   |  |
| UNC93B1   | NM 030930.2    | ENST00000227471 | LRG 123 | 100     |   |   |  |
| UNG       | NM 080911.2    | ENST00000242576 | LRG 124 | 100     |   |   |  |
| USB1      | NM 024598.3    | ENST00000219281 | LRG 352 | 100     |   |   |  |
| VPS13B    | NM 017890.4    | ENST00000358544 | LRG 351 | 99.9992 |   |   |  |
| VPS45     | NP 009190.2    | ENST00000369130 |         | 100     |   |   |  |
| WAS       | NM 000377.2    | ENST00000376701 | LRG 125 | 100     |   |   |  |
| WIPF1     | NM 001077269.1 | ENST00000392547 | LRG 374 | 100     |   |   |  |
| XIAP      | NM 001167.3    | ENST00000371199 | LRG 19  | 99.9986 |   |   |  |
| ZAP70     | NM 001079.3    | ENST00000264972 | LRG 126 | 100     |   |   |  |
| ZBTB24    | NM 014797.2    | ENST00000230122 | LRG 326 | 100     |   |   |  |
